# Supplementary material for: PKC and AKT Modulate cGMP/PKG Signaling Pathway on Platelet Aggregation in Experimental Sepsis
Source: PLOS journal article supplement (doi:10.1371/journal.pone.0137901), 2015-09-16
Supplement: S1 (10.1371/journal.pone.0137901.s001) [file journal.pone.0137901.s001]

**S1 table** Data of platelet aggregation of rats treated with saline or LPS (6 h). Platelets were incubated with 1% DMSO (vehicle) or the Src inhibitor PP2 (10  $\mu$ M) for 3 min before ADP (10  $\mu$ M) addition. Values are presented as means  $\pm$  S.E.M. (n= 4 different animals in each group).

|                 | Saline group |       | LPS group |       |
|-----------------|--------------|-------|-----------|-------|
|                 | Mean         | S.E.M | Mean      | S.E.M |
| Platelet + DMSO | 72           | 3.0   | 26.0      | 5.0   |
| Platelet + PP2  | 53.7         | 7.0   | 38        | 3.0   |
